# Supplementary material
Source: PubMed Central journal article supplement (PMC3669788)
Supplement: 97320630009357S1.pdf [file 97320630009357S1.pdf]

## Supplementary material:

**Table 1:** Distribution of biofilm-forming strains in relation to various *Candida spp.* isolates.

| <i>Candida spp.</i>    | Biofilm (+) | Biofilm (-) | Biofilm-forming (+) strains (%) | Total  |
|------------------------|-------------|-------------|---------------------------------|--------|
| <i>C. albicans</i>     | 36          | 90          | 29                              | 36/126 |
| <i>C. glabrata</i>     | 14          | 6           | 70                              |        |
| <i>C. tropicalis</i>   | 2           | 2           | 50                              |        |
| <i>C. kefyr</i>        | 2           | 0           | 100                             | 21/31  |
| <i>C. utilis</i>       | 1           | 0           | 100                             | (68%)  |
| <i>C. famata</i>       | 1           | 0           | 100                             |        |
| <i>S. cerevisiae</i>   | 0           | 2           | 0.0                             |        |
| <i>R. mucilaginosa</i> | 1           | 0           | 100                             |        |

**Table 2:** *In vitro* effects of EDTA, cycloheximide, and heparin on the abilities of *C. albicans* and non-*albicans* tested yeast-isolates to form biofilms.

| Species number(n)           | Saline % Biofilm positive | EDTA % Biofilm positive | Cycloheximide % Biofilm positive | Heparin % Biofilm positive |
|-----------------------------|---------------------------|-------------------------|----------------------------------|----------------------------|
| <i>C. albicans</i> (n=126)  | 36 (29)*                  | 25 (20) <sup>a</sup>    | 8 (6) <sup>b</sup>               | 42(33) <sup>c</sup>        |
| Non- <i>albicans</i> (n=31) | 21(68)                    | 0.0(0.0) <sup>d</sup>   | NT                               | 23(74) <sup>e</sup>        |

\* As compared to saline-control: a,  $P=0.015$ ; b,  $P<0.0001$ ; c,  $P=0.414$ ; d,  $P<0.0001$ ; e,  $P=0.576$ , and NT; not determined.

**Table 3:** MIC<sub>50</sub> and MIC<sub>90</sub> values of E test-antifungal agents against tested *Candida spp.*

| Species                      | E test (µg/ml) |            |                   |                   |             |
|------------------------------|----------------|------------|-------------------|-------------------|-------------|
|                              | Antifungal     | Range      | MIC <sub>50</sub> | MIC <sub>90</sub> | %Resistance |
| <i>C. albicans</i> (n= 126)  | Itraconazole   | 0.002->32  | 0.125             | 2                 | 14          |
|                              | 5-Flucytosine  | 0.002->32  | 0.064             | >32               | 14          |
|                              | Amphotericin B | 0.002-0.38 | 0.023             | 0.047             | 0           |
| Non- <i>albicans</i> (n= 31) | Itraconazole   | 0.002->32  | 0.75              | >32               | 32          |
|                              | 5-Flucytosine  | 0.002-1.5  | 0.016             | 0.064             | 0           |
|                              | Amphotericin B | 0.002-0.19 | 0.023             | 0.064             | 0           |
